# Supplementary material for: Distinct characteristics of the COVID-19 among children and young adolescents treated at Gulu Regional Referral Hospital; Northern Uganda: A cross-sectional study
Source: Research Square preprint supplement (doi:10.21203/rs.3.rs-1293131/v1), 2022-01-25
Supplement: Supplementary file 1 [file fa98a511f8e014fcccd21b46.docx]

| **Case Processing Summary** | | | | | | | | | | |
| --- | --- | --- | --- | --- | --- | --- | --- | --- | --- | --- |
|  | Cases | | | | | | | | | |
| Valid | | | Missing | | | Total | | | |
| N | | Percent | N | | Percent | N | | Percent | |
| Duration of Stay | 41 | | 100.0% | 0 | | 0.0% | 41 | | 100.0% | |
| **Descriptives** | | | | | | | | | | | |
|  | | | | | | | | Statistic | | Std. Error | |
| Duration of Stay | | Mean | | | | | | 14.44 | | 1.632 | |
| 95% Confidence Interval for Mean | | | Lower Bound | | | 11.14 | |  | |
| Upper Bound | | | 17.74 | |  | |
| 5% Trimmed Mean | | | | | | 13.15 | |  | |
| Median | | | | | | 13.00 | |  | |
| Variance | | | | | | 109.252 | |  | |
| Std. Deviation | | | | | | 10.452 | |  | |
| Minimum | | | | | | 2 | |  | |
| Maximum | | | | | | 72 | |  | |
| Range | | | | | | 70 | |  | |
| Interquartile Range | | | | | | 6 | |  | |
| Skewness | | | | | | 4.360 | | .369 | |
| Kurtosis | | | | | | 23.727 | | .724 | |

| **Percentiles** | | | | | | | | | | | | | | | | | | | |
| --- | --- | --- | --- | --- | --- | --- | --- | --- | --- | --- | --- | --- | --- | --- | --- | --- | --- | --- | --- |
|  | | | | | | | Percentiles | | | | | | | | | | | | |
| 5 | | 10 | | | 25 | | 50 | 75 | | 90 | 95 | |
| Weighted Average(Definition 1) | | | | Duration of Stay | | | 4.20 | | 7.00 | | | 10.00 | | 13.00 | 15.50 | | 19.60 | 27.00 | |
| Tukey's Hinges | | | | Duration of Stay | | |  | |  | | | 10.00 | | 13.00 | 15.00 | |  |  | |
| **Case Processing Summary** | | | | | | | | | | | | |
|  | Cases | | | | | | | | | | | |
| Valid | | | | Missing | | | Total | | | | |
| N | | Percent | | N | Percent | | N | | Percent | | |
| Age | 41 | | 100.0% | | 0 | 0.0% | | 41 | | 100.0% | | |
| **Descriptives** | | | | | | | | | | | | | | | | | | | | |
|  | | | | | | | | | | | | | | | | Statistic | | | Std. Error | |
| Age | | Mean | | | | | | | | | | | | | | 18.12 | | | .305 | |
| 95% Confidence Interval for Mean | | | | | | | | | Lower Bound | | | | | 17.51 | | |  | |
| Upper Bound | | | | | 18.74 | | |  | |
| 5% Trimmed Mean | | | | | | | | | | | | | | 18.27 | | |  | |
| Median | | | | | | | | | | | | | | 19.00 | | |  | |
| Variance | | | | | | | | | | | | | | 3.810 | | |  | |
| Std. Deviation | | | | | | | | | | | | | | 1.952 | | |  | |
| Minimum | | | | | | | | | | | | | | 13 | | |  | |
| Maximum | | | | | | | | | | | | | | 20 | | |  | |
| Range | | | | | | | | | | | | | | 7 | | |  | |
| Interquartile Range | | | | | | | | | | | | | | 3 | | |  | |
| Skewness | | | | | | | | | | | | | | -.985 | | | .369 | |
| Kurtosis | | | | | | | | | | | | | | .050 | | | .724 | |

| **Percentiles** | | | | | | | | |
| --- | --- | --- | --- | --- | --- | --- | --- | --- |
|  | | Percentiles | | | | | | |
| 5 | 10 | 25 | 50 | 75 | 90 | 95 |
| Weighted Average(Definition 1) | Age | 14.10 | 15.00 | 17.00 | 19.00 | 20.00 | 20.00 | 20.00 |
| Tukey's Hinges | Age |  |  | 17.00 | 19.00 | 20.00 |  |  |

| **Case Processing Summary** | | | | | | |
| --- | --- | --- | --- | --- | --- | --- |
|  | Cases | | | | | |
| Valid | | Missing | | Total | |
| N | Percent | N | Percent | N | Percent |
| Duration of symptoms | 24 | 58.5% | 17 | 41.5% | 41 | 100.0% |

| **Descriptives** | | | | |
| --- | --- | --- | --- | --- |
|  | | | Statistic | Std. Error |
| Duration of symptoms | Mean | | 7.96 | 1.505 |
| 95% Confidence Interval for Mean | Lower Bound | 4.84 |  |
| Upper Bound | 11.07 |  |
| 5% Trimmed Mean | | 7.12 |  |
| Median | | 7.00 |  |
| Variance | | 54.389 |  |
| Std. Deviation | | 7.375 |  |
| Minimum | | 1 |  |
| Maximum | | 31 |  |
| Range | | 30 |  |
| Interquartile Range | | 9 |  |
| Skewness | | 1.820 | .472 |
| Kurtosis | | 3.489 | .918 |

| **Percentiles** | | | | | | | | |
| --- | --- | --- | --- | --- | --- | --- | --- | --- |
|  | | Percentiles | | | | | | |
| 5 | 10 | 25 | 50 | 75 | 90 | 95 |
| Weighted Average(Definition 1) | Duration of symptoms | 1.25 | 2.00 | 3.00 | 7.00 | 12.25 | 19.00 | 29.25 |
| Tukey's Hinges | Duration of symptoms |  |  | 3.00 | 7.00 | 11.50 |  |  |
